# Supplementary material for: Activating bulk nickel foam for the electrochemical oxidization of ethanol by anchoring MnO2@Au nanorods
Source: Royal Society of Chemistry journal article supplement (doi:10.1039/d3ta00367a), 2023-01-01
Supplement: d3ta00367a1.pdf [file d3ta00367a1.pdf]

## Electronic Supplementary Information (ESI)

### Activating Bulk Nickel Foam for Electrochemical Oxidization of Ethanol by Anchoring MnO<sub>2</sub>@Au nanorods

Shuiping Zhong<sup>a,b,c</sup>, Huanlin Zhu<sup>a</sup>, Lei Yang<sup>a</sup>, Xiaopeng Chi<sup>a</sup>, Wen Tan<sup>a</sup>, Wei  
Weng<sup>\*a,b</sup>

a. Zijin School of Geology and Mining, Fuzhou University, Fuzhou 350108, China

b. Fujian Key Laboratory of Green Extraction and High-Value Utilization of New  
Energy Metals, Fuzhou University, Fuzhou 350108, China

c. Zijin Mining group Co. Ltd, State Key Laboratory of Comprehensive Utilization of  
Low Grade Refractory Gold Ores, Shanghang, Fujian 364200, China

Corresponding Author: Wei Weng; Email: wengwei198912@163.com

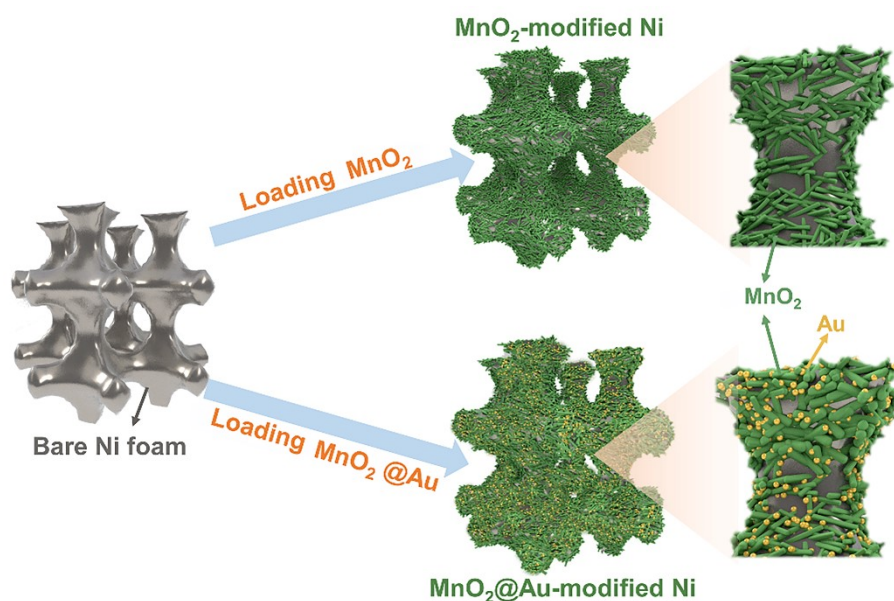

**Fig. S1** Illustration for the electrodes of bare Ni foam, Ni-MnO<sub>2</sub>, and Ni-MnO<sub>2</sub>@Au

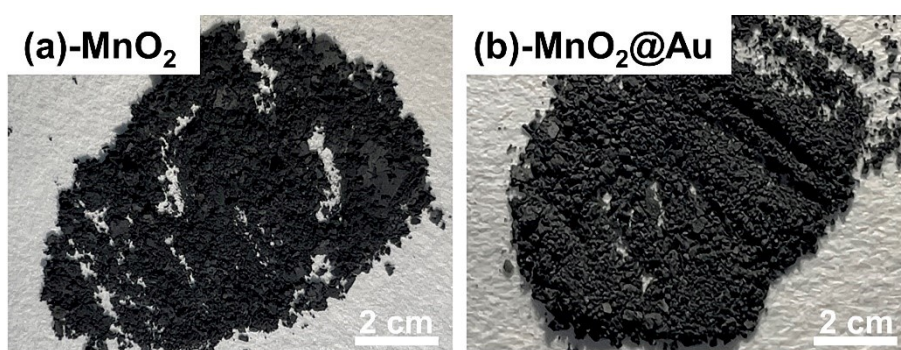

**Fig. S2** The optical images of MnO<sub>2</sub> (a) and MnO<sub>2</sub>@Au

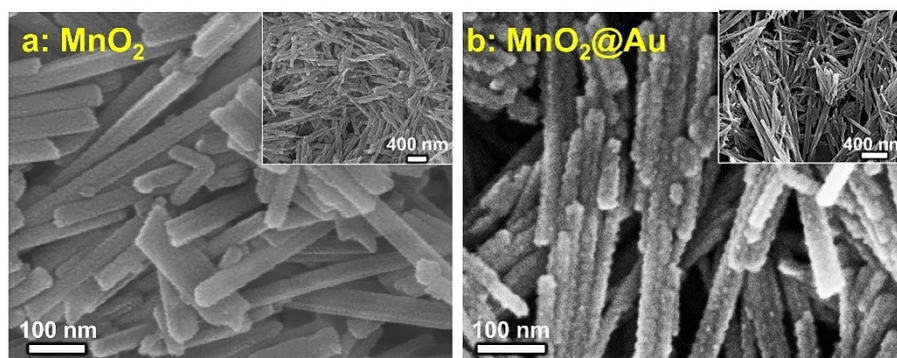

**Fig. S3** SEM images of  $\text{MnO}_2$  (a) and  $\text{MnO}_2@Au$  (b)

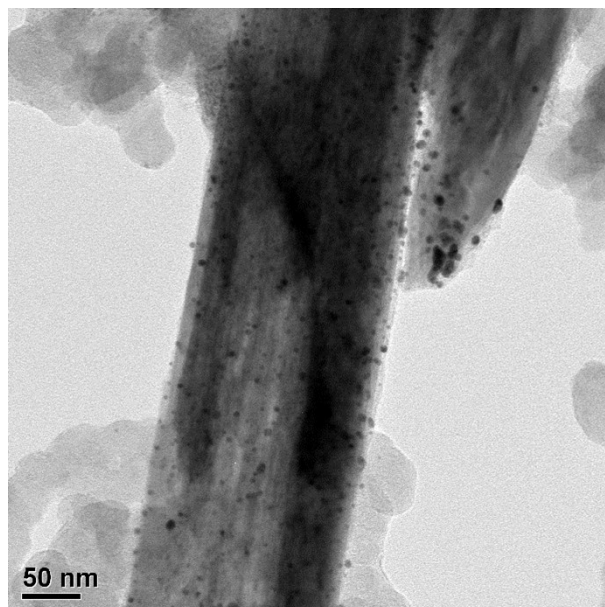

**Fig. S4** TEM images of  $\text{MnO}_2@Au$  scraped from the nickel foam after long-term electrolysis at 1.8 V vs. RHE

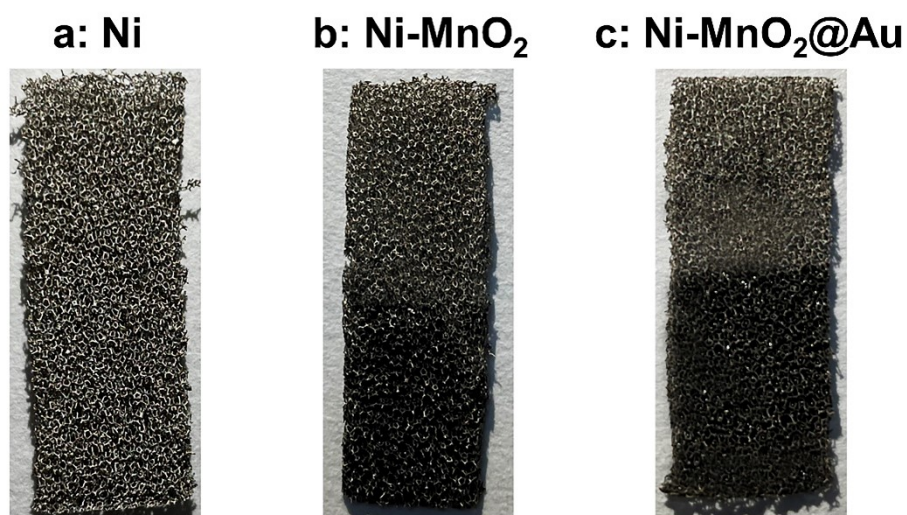

**Fig. S5** The optical image of Ni (a), Ni-MnO<sub>2</sub>(b), and Ni-MnO<sub>2</sub>@ Au(c)

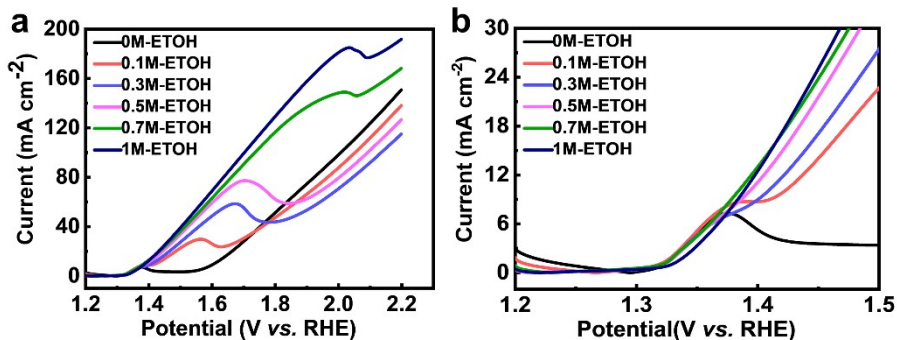

**Fig. S6** LSV curves of different ETOH concentrations at  $50 \text{ mV s}^{-1}$  in Ni foam electrode:  $1.2 \sim 2.2 \text{ V vs. RHE}$  (a);  $1.2 \sim 1.5 \text{ V vs. RHE}$  (b)

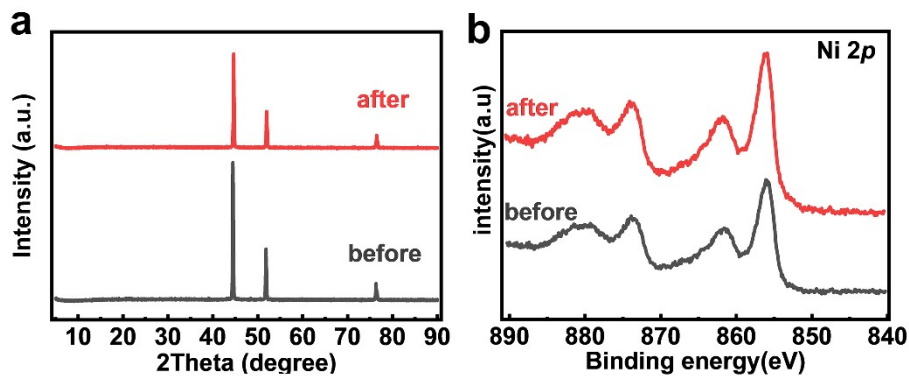

**Fig. S7** Ni-MnO<sub>2</sub>@Au before and after electrolysis at  $1.8 \text{ V vs. RHE}$  for 7200 s: (a) XRD; (b) XPS spectrum of Ni 2p

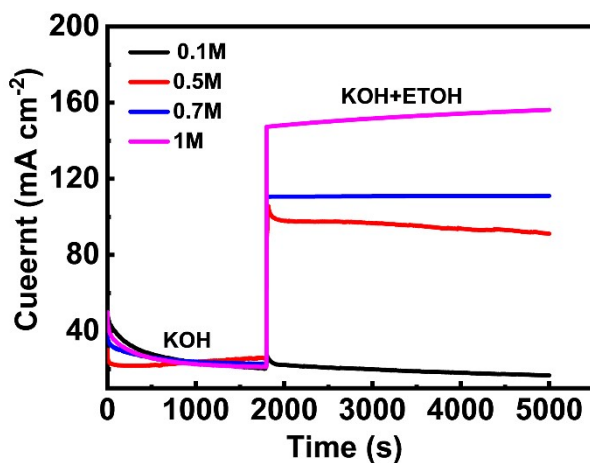

**Fig. S8** Potentiostatic electrolysis at  $1.8 \text{ V vs. RHE}$  for Ni-MnO<sub>2</sub>@Au electrode

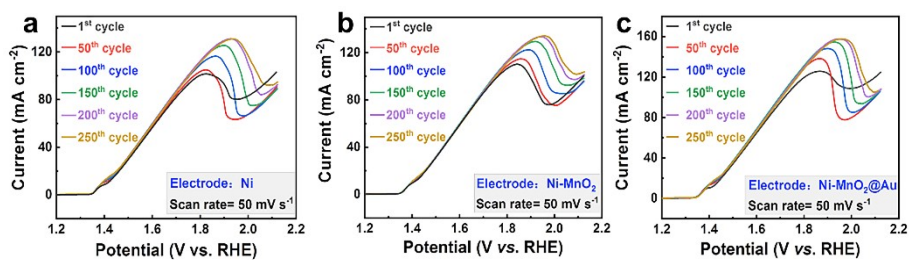

**Fig. S9** LSV curves of different cycles at  $50 \text{ mV s}^{-1}$ : (a) Ni; (b) Ni-MnO<sub>2</sub>; (c) Ni-MnO<sub>2</sub>@Au

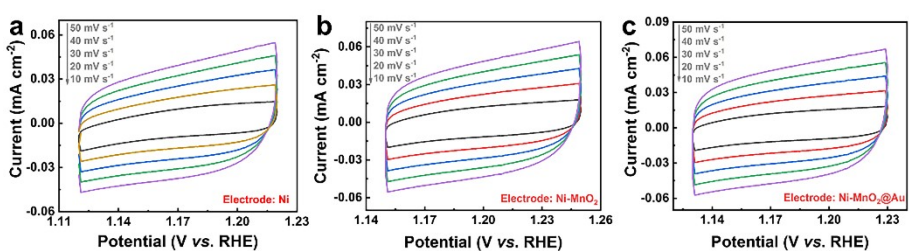

**Fig. S10** CV curves at different scanning rate in the non-faradic regions: (a) Ni; (b) Ni-MnO<sub>2</sub>; (c) Ni-MnO<sub>2</sub>@Au

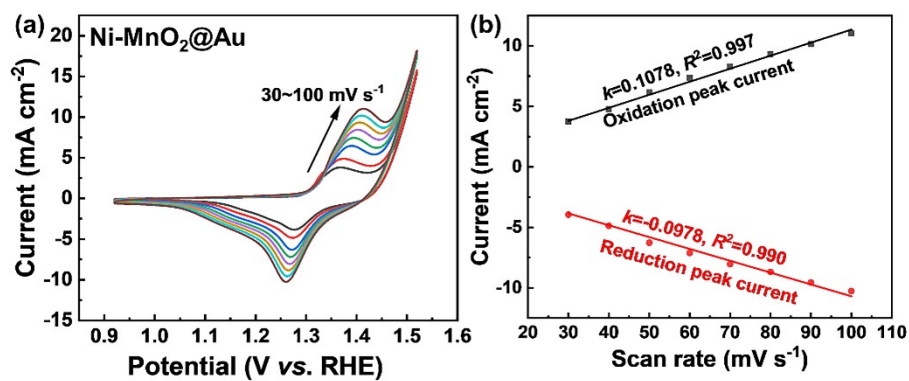

**Fig. S11** (a) Cyclic voltammogram curves for bare foam Ni-MnO<sub>2</sub>@Au in 0.5 M KOH solution and (b) the corresponding linear simulation of redox peak currents

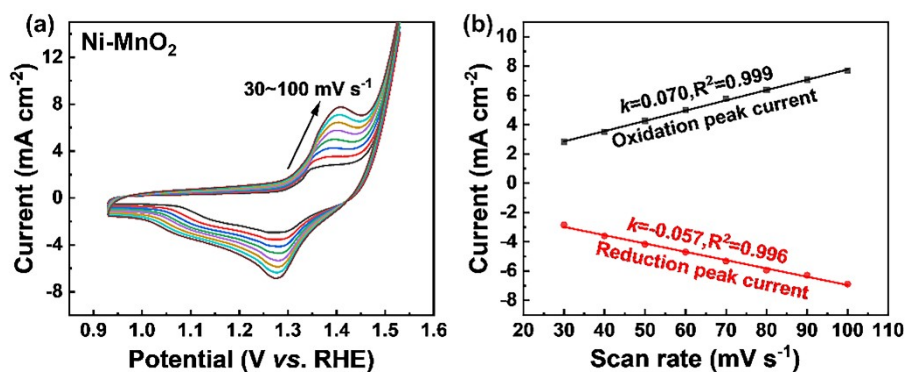

**Fig. S12** (a) Cyclic voltammogram curves for bare foam Ni-MnO<sub>2</sub> in 0.5 M KOH solution and (b) the corresponding linear simulation of redox peak currents

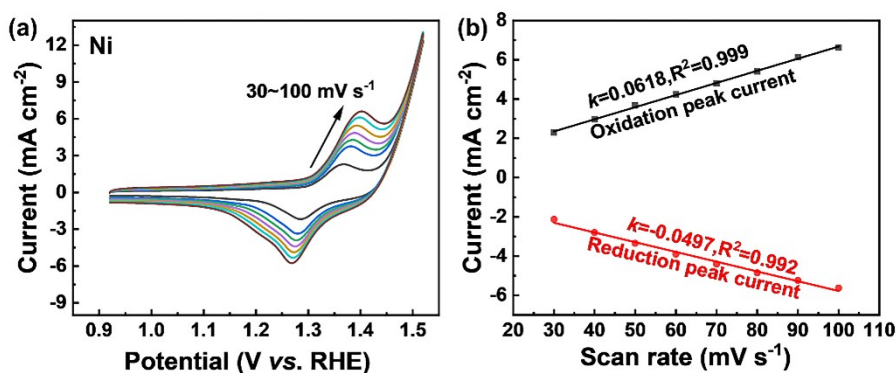

**Fig. S13** (a) Cyclic voltammogram curves for bare foam Ni in 0.5 M KOH solution and (b) the corresponding linear simulation of redox peak currents

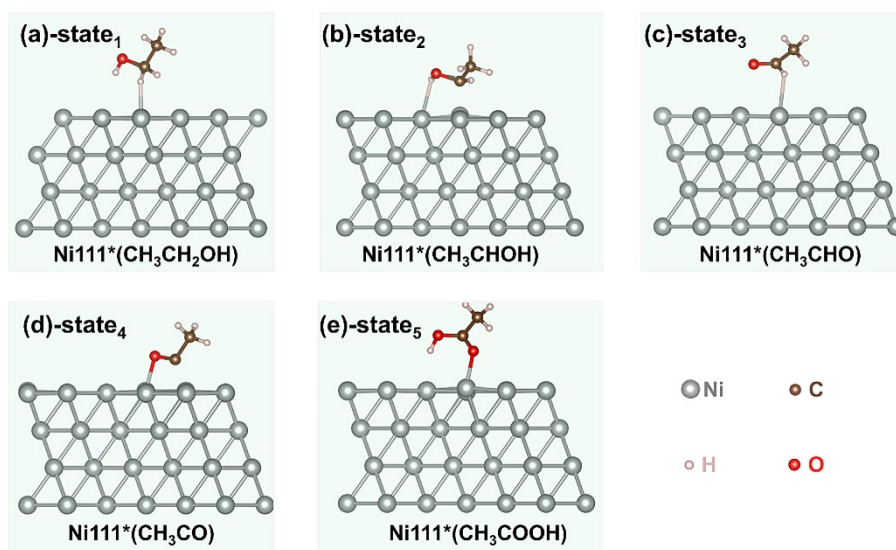

**Fig. S14** Optimized structures for different reaction intermediates on Ni: (a) Ni<sub>111</sub>\*CH<sub>3</sub>CH<sub>2</sub>OH; (b) Ni<sub>111</sub>\*CH<sub>3</sub>CHOH; (c) Ni<sub>111</sub>\*CH<sub>3</sub>CHO; (d) Ni<sub>111</sub>\*CH<sub>3</sub>CO; (e) Ni<sub>111</sub>\*CH<sub>3</sub>COOH

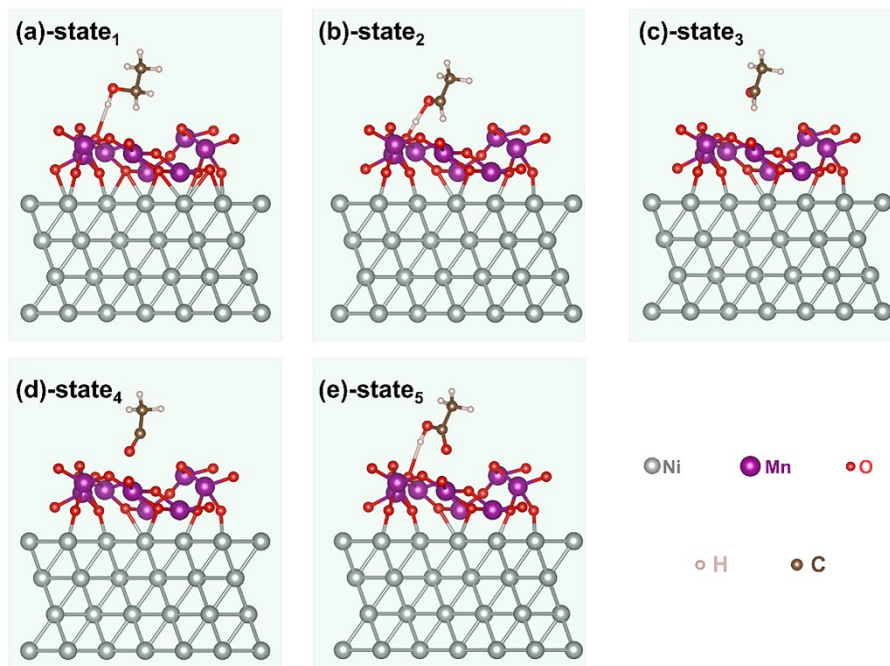

**Fig. S15** Optimized structures for different reaction intermediates on Ni-MnO<sub>2</sub>: (a) (Ni-MnO<sub>2</sub>)\*CH<sub>3</sub>CH<sub>2</sub>OH; (b) (Ni-MnO<sub>2</sub>)\*CH<sub>3</sub>CHOH; (c) (Ni-MnO<sub>2</sub>)\*CH<sub>3</sub>CHO; (d) (Ni-MnO<sub>2</sub>)\*CH<sub>3</sub>CO; (e) (Ni-MnO<sub>2</sub>)\*CH<sub>3</sub>COOH

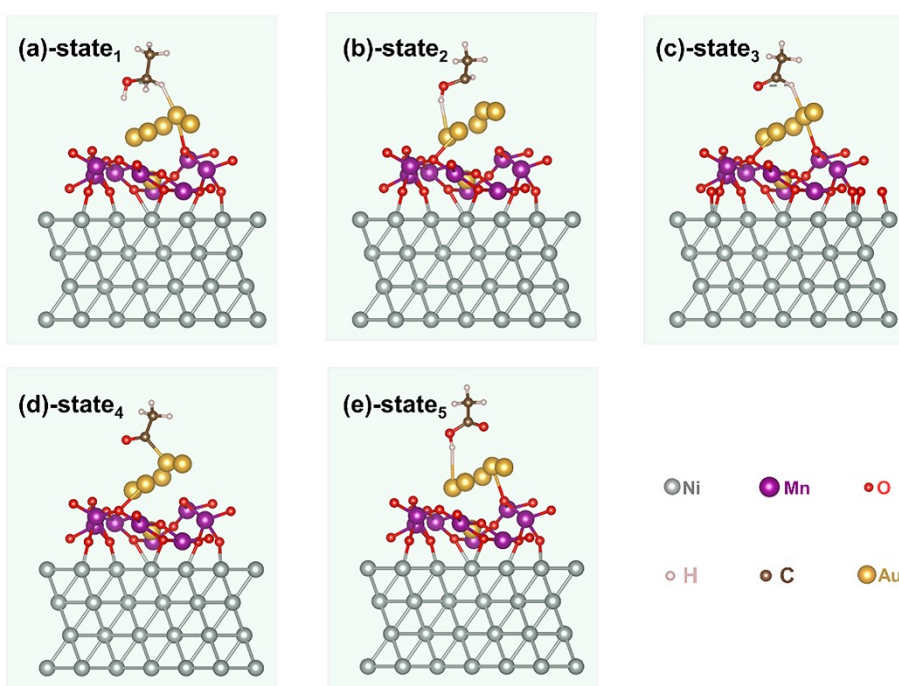

**Fig. S16** Optimized structures for different reaction intermediates on Ni-MnO<sub>2</sub>@Au: (a) (Ni-MnO<sub>2</sub>@Au)\*CH<sub>3</sub>CH<sub>2</sub>OH; (b) (Ni-MnO<sub>2</sub>@Au)\*CH<sub>3</sub>CHOH; (c) (Ni-MnO<sub>2</sub>@Au)\*CH<sub>3</sub>CHO; (d) (Ni-MnO<sub>2</sub>@Au)\*CH<sub>3</sub>CO; (e) (Ni-MnO<sub>2</sub>@Au)\*CH<sub>3</sub>COOH

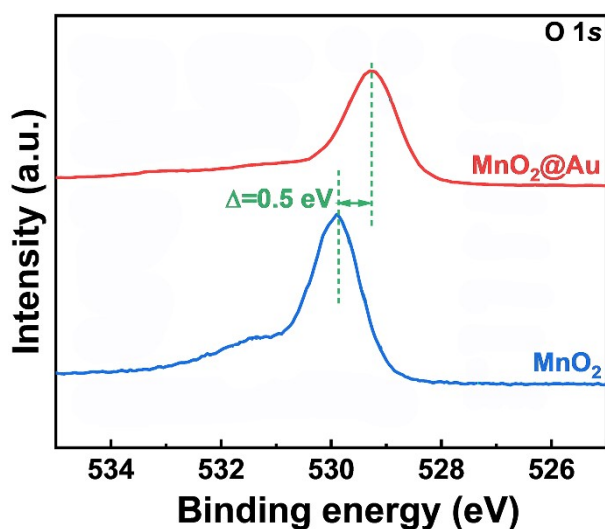

Fig. S17 The XPS O 1s spectra of MnO<sub>2</sub> and MnO<sub>2</sub>@Au

Table S1 Performance comparison for EOR in alkaline solution

| Catalysts                              | Peak current in LSV or CV (mA cm <sup>-2</sup> ) | Current retention after long-term chronopotentiometry  | Ref.                                                      |
|----------------------------------------|--------------------------------------------------|--------------------------------------------------------|-----------------------------------------------------------|
| Ni-MnO <sub>2</sub> @Au                | 148                                              | 38 mA cm <sup>-2</sup> after 5000s at 1.8 V vs. RHE    | This work                                                 |
| Pd/B-N-Ti <sub>3</sub> C <sub>2</sub>  | 149                                              | 18.5 mA cm <sup>-2</sup> at 0.72 V vs. RHE after 3600s | <i>ACS Appl. Mater. Inter.</i> 2022, 14, 12223-12233      |
| Nanographitic flakes/NiO nanoparticles | 1.51                                             | 2.9 mA cm <sup>-2</sup> @ 1.5 V vs. RHE after 3000 s   | <i>ACS appl. mater. Inter.</i> 8, 2016, 8(25):15975-15984 |
| PdZn/NC@ZnO                            | 2.83                                             | 0.81 mA cm <sup>-2</sup> @ 0.61 V vs. RHE after 3600s  | <i>Nat. Commun.</i> , 2021, 12: 5273                      |
| Pd <sub>7</sub> Ag NSs                 | 14                                               | 22.4 mA cm <sup>-2</sup> @ 0.8 V vs. RHE after 3600s   | <i>Adv. Funct. Mater.</i> 2020, 30, 2000255               |
| Au-MnO <sub>2</sub>                    | -                                                | 17mA cm <sup>-2</sup> @ 1.5 V vs. RHE after 7200s      | <i>J. Mater. Chem. A</i> ,2020,8:16902-16907              |
| Pd-Ni-MnO <sub>2</sub>                 | 1.46                                             | 0.3 mA cm <sup>-2</sup> @ 0.72 V vs. RHE after 250 s   | <i>Int. J. Hydrogen Energ.</i> 2019, 44: 28194-28205      |
| Pd-Ag nanowires                        | 71                                               | 14.5 mA cm <sup>-2</sup> @ 0.7 V vs. RHE after 2000s   | <i>Appl. Catal. B- Environ.</i> , 2019, 249: 116–125      |

Note: some data are recalculated from the values in the figures of the references



**Table S2 Ni-MnO<sub>2</sub>: Bader charge analysis for the specific charge of a single atom**

| Serial number | Element name | Number of initial<br>valence electrons | Actual number<br>of electrons | Total number of electrons<br>gained or Lost |
|---------------|--------------|----------------------------------------|-------------------------------|---------------------------------------------|
| 1             | Ni           |                                        | 9.98705                       |                                             |
| 2             | Ni           |                                        | 9.94865                       |                                             |
| 3             | Ni           |                                        | 9.97943                       |                                             |
| 4             | Ni           |                                        | 9.86284                       |                                             |
| 5             | Ni           |                                        | 10.04622                      |                                             |
| 6             | Ni           |                                        | 9.93377                       |                                             |
| 7             | Ni           |                                        | 10.00553                      |                                             |
| 8             | Ni           |                                        | 9.86056                       |                                             |
| 9             | Ni           |                                        | 10.02437                      |                                             |
| 10            | Ni           | 10                                     | 10.01496                      | 1.5611e <sup>-</sup>                        |
| 11            | Ni           | (exist as Ni <sup>0</sup> )            | 9.99196                       |                                             |
| 12            | Ni           |                                        | 9.93761                       |                                             |
| 13            | Ni           |                                        | 10.04355                      |                                             |
| 14            | Ni           |                                        | 9.96716                       |                                             |
| 15            | Ni           |                                        | 10.01214                      |                                             |
| 16            | Ni           |                                        | 9.94918                       |                                             |
| 17            | Ni           |                                        | 10.0305                       |                                             |
| 18            | Ni           |                                        | 9.93817                       |                                             |
| 19            | Ni           |                                        | 9.94732                       |                                             |
| 20            | Ni           |                                        | 10.02606                      |                                             |
| 21            | Ni           |                                        | 9.99524                       |                                             |
| 22            | Ni           |                                        | 9.96066                       |                                             |
| 23            | Ni           |                                        | 9.99758                       |                                             |
| 24            | Ni           |                                        | 9.90331                       |                                             |
| 25            | Ni           |                                        | 10.01099                      |                                             |
| 26            | Ni           |                                        | 9.9721                        |                                             |
| 27            | Ni           |                                        | 9.96631                       |                                             |
| 28            | Ni           |                                        | 9.98035                       |                                             |
| 29            | Ni           |                                        | 10.03386                      |                                             |
| 30            | Ni           |                                        | 9.99057                       |                                             |
| 31            | Ni           |                                        | 10.02024                      |                                             |
| 32            | Ni           |                                        | 9.97811                       |                                             |
| 33            | Ni           |                                        | 10.0411                       |                                             |
| 34            | Ni           |                                        | 9.95696                       |                                             |
| 35            | Ni           |                                        | 9.99168                       |                                             |
| 36            | Ni           |                                        | 9.86598                       |                                             |
| 37            | Ni           |                                        | 10.04776                      |                                             |
| 38            | Ni           |                                        | 10.01717                      |                                             |
| 39            | Ni           |                                        | 9.95001                       |                                             |
| 40            | Ni           |                                        | 9.86136                       |                                             |
| 41            | Ni           |                                        | 10.04189                      |                                             |

|       |    |                              |          |                        |
|-------|----|------------------------------|----------|------------------------|
| 42    | Ni |                              | 9.95392  |                        |
| 43    | Ni |                              | 9.99271  |                        |
| 44    | Ni |                              | 9.91248  |                        |
| 45    | Ni |                              | 9.98808  |                        |
| 46    | Ni |                              | 9.97025  |                        |
| 47    | Ni |                              | 9.95959  |                        |
| 48    | Ni |                              | 9.90671  |                        |
| 49    | Ni |                              | 10.05901 |                        |
| 50    | Ni |                              | 9.99997  |                        |
| 51    | Ni |                              | 10.00939 |                        |
| 52    | Ni |                              | 9.93751  |                        |
| 53    | Ni |                              | 10.03938 |                        |
| 54    | Ni |                              | 10.00746 |                        |
| 55    | Ni |                              | 9.97868  |                        |
| 56    | Ni |                              | 9.97543  |                        |
| 57    | Ni |                              | 10.02899 |                        |
| 58    | Ni |                              | 10.00331 |                        |
| 59    | Ni |                              | 9.97969  |                        |
| 60    | Ni |                              | 9.8019   |                        |
| 61    | Ni |                              | 10.0209  |                        |
| 62    | Ni |                              | 9.96722  |                        |
| 63    | Ni |                              | 9.96441  |                        |
| 64    | Ni |                              | 9.89163  |                        |
| ..... |    |                              |          |                        |
| 65    | Mn |                              | 5.71331  |                        |
| 66    | Mn |                              | 5.55049  |                        |
| 67    | Mn |                              | 5.6563   |                        |
| 68    | Mn | 3                            | 5.85397  |                        |
| 69    | Mn | (exist as Mn <sup>4+</sup> ) | 5.59477  | 21.52719e <sup>-</sup> |
| 70    | Mn |                              | 5.63158  |                        |
| 71    | Mn |                              | 5.68492  |                        |
| 72    | Mn |                              | 5.84184  |                        |
| ..... |    |                              |          |                        |
| 73    | O  |                              | 6.16006  |                        |
| 74    | O  |                              | 6.68239  |                        |
| 75    | O  |                              | 6.88214  |                        |
| 76    | O  |                              | 6.90285  |                        |
| 77    | O  |                              | 6.93831  |                        |
| 78    | O  |                              | 6.78205  |                        |
| 79    | O  | 8                            | 6.75954  |                        |
| 80    | O  | (exist as O <sup>2-</sup> )  | 6.9154   |                        |
| 81    | O  |                              | 6.87742  |                        |
| 82    | O  |                              | 6.71935  |                        |
| 83    | O  |                              | 6.82462  | 19.9663e <sup>-</sup>  |
| 84    | O  |                              | 6.73912  |                        |
| 85    | O  |                              | 6.38664  |                        |

|    |   |         |
|----|---|---------|
| 86 | O | 6.77598 |
| 87 | O | 6.91053 |
| 88 | O | 6.77731 |

**Table S3** Ni- MnO<sub>2</sub>@Au: Bader charge analysis for the specific charge of a single atom

| Serial number | Element name | Number of initial<br>valence electrons | Actual number<br>of electrons | Total number of electrons<br>gained or lost |
|---------------|--------------|----------------------------------------|-------------------------------|---------------------------------------------|
| 1             | Ni           |                                        | 9.98989                       |                                             |
| 2             | Ni           |                                        | 9.94333                       |                                             |
| 3             | Ni           |                                        | 9.98008                       |                                             |
| 4             | Ni           |                                        | 9.85336                       |                                             |
| 5             | Ni           |                                        | 10.04746                      |                                             |
| 6             | Ni           |                                        | 9.97855                       |                                             |
| 7             | Ni           |                                        | 10.00632                      |                                             |
| 8             | Ni           |                                        | 9.85914                       |                                             |
| 9             | Ni           |                                        | 10.02199                      |                                             |
| 10            | Ni           |                                        | 10.00824                      |                                             |
| 11            | Ni           |                                        | 9.9946                        |                                             |
| 12            | Ni           |                                        | 9.92076                       |                                             |
| 13            | Ni           |                                        | 10.04532                      |                                             |
| 14            | Ni           |                                        | 9.93697                       |                                             |
| 15            | Ni           |                                        | 10.01676                      |                                             |
| 16            | Ni           |                                        | 9.95013                       |                                             |
| 17            | Ni           |                                        | 10.01356                      |                                             |
| 18            | Ni           | 10                                     | 9.93896                       | 1.51597e <sup>-</sup>                       |
| 19            | Ni           | (exist as Ni <sup>0</sup> )            | 9.94373                       |                                             |
| 20            | Ni           |                                        | 10.02452                      |                                             |
| 21            | Ni           |                                        | 10.0147                       |                                             |
| 22            | Ni           |                                        | 9.95557                       |                                             |
| 23            | Ni           |                                        | 9.99823                       |                                             |
| 24            | Ni           |                                        | 9.89227                       |                                             |
| 25            | Ni           |                                        | 10.02726                      |                                             |
| 26            | Ni           |                                        | 9.9975                        |                                             |
| 27            | Ni           |                                        | 9.97424                       |                                             |
| 28            | Ni           |                                        | 9.97892                       |                                             |
| 29            | Ni           |                                        | 10.03484                      |                                             |
| 30            | Ni           |                                        | 9.99114                       |                                             |
| 31            | Ni           |                                        | 10.02407                      |                                             |
| 32            | Ni           |                                        | 9.98035                       |                                             |
| 33            | Ni           |                                        | 10.04033                      |                                             |
| 34            | Ni           |                                        | 9.94044                       |                                             |
| 35            | Ni           |                                        | 9.99091                       |                                             |
| 36            | Ni           |                                        | 9.86807                       |                                             |

|    |    |                              |          |                        |
|----|----|------------------------------|----------|------------------------|
| 37 | Ni |                              | 10.05216 |                        |
| 38 | Ni |                              | 10.01227 |                        |
| 39 | Ni |                              | 9.95708  |                        |
| 40 | Ni |                              | 9.86302  |                        |
| 41 | Ni |                              | 10.04678 |                        |
| 42 | Ni |                              | 9.9533   |                        |
| 43 | Ni |                              | 10.00498 |                        |
| 44 | Ni |                              | 9.91197  |                        |
| 45 | Ni |                              | 9.99023  |                        |
| 46 | Ni |                              | 9.9701   |                        |
| 47 | Ni |                              | 9.96231  |                        |
| 48 | Ni |                              | 9.8977   |                        |
| 49 | Ni |                              | 10.05633 |                        |
| 50 | Ni |                              | 9.98177  |                        |
| 51 | Ni |                              | 9.99898  |                        |
| 52 | Ni |                              | 9.98871  |                        |
| 53 | Ni |                              | 10.03765 |                        |
| 54 | Ni |                              | 9.99996  |                        |
| 55 | Ni |                              | 9.97625  |                        |
| 56 | Ni |                              | 9.97144  |                        |
| 57 | Ni |                              | 10.02359 |                        |
| 58 | Ni |                              | 9.99957  |                        |
| 59 | Ni |                              | 9.98797  |                        |
| 60 | Ni |                              | 9.80971  |                        |
| 61 | Ni |                              | 9.99837  |                        |
| 62 | Ni |                              | 9.99861  |                        |
| 63 | Ni |                              | 9.96337  |                        |
| 64 | Ni |                              | 9.88736  |                        |
| 65 | Mn |                              | 5.85314  |                        |
| 66 | Mn |                              | 5.77433  |                        |
| 67 | Mn |                              | 5.77872  |                        |
| 68 | Mn | 3                            | 5.96497  |                        |
| 69 | Mn | (exist as Mn <sup>4+</sup> ) | 5.82729  | 22.75323e <sup>-</sup> |
| 70 | Mn |                              | 5.75506  |                        |
| 71 | Mn |                              | 5.8483   |                        |
| 72 | Mn |                              | 5.95144  |                        |
| 73 | O  |                              | 6.16086  |                        |
| 74 | O  |                              | 6.74836  |                        |
| 75 | O  |                              | 6.8953   |                        |
| 76 | O  | 8                            | 6.9067   |                        |
| 77 | O  | (exist as O <sup>2-</sup> )  | 6.94731  | 19.64906e <sup>-</sup> |
| 78 | O  |                              | 6.81432  |                        |
| 79 | O  |                              | 6.81432  |                        |
| 80 | O  |                              | 6.92825  |                        |

|    |    |                             |          |           |
|----|----|-----------------------------|----------|-----------|
| 81 | O  |                             | 6.88294  |           |
| 82 | O  |                             | 6.77565  |           |
| 83 | O  |                             | 6.81441  |           |
| 84 | O  |                             | 6.79869  |           |
| 85 | O  |                             | 6.38963  |           |
| 86 | O  |                             | 6.78147  |           |
| 87 | O  |                             | 6.90928  |           |
| 88 | O  |                             | 6.79431  |           |
| 89 | Au |                             | 10.96211 |           |
| 90 | Au |                             | 10.96321 |           |
| 91 | Au | 11                          | 10.58945 |           |
| 92 | Au | (exist as Au <sup>0</sup> ) | 10.64632 | 1.59142e- |
| 93 | Au |                             | 10.58861 |           |
| 94 | Au |                             | 10.65887 |           |
